# Supplementary material
Source: publisher site journal article supplement (https://www.dovepress.com/article/333994)
Supplement: Supplementary file 1 [file get_supplementary_file.php]

**Appendix:**

First Section: participants demographic data

1. Sex:

- Female
- Male

1. How old are you:

- Specify please ………….

1. The region you are living in now:

- Northern region
- Western region
- Eastern region
- Southern region
- Central region

1. Educational level:

- High school
- Bachelor
- Master
- Other: ………….

1. Total monthly income:

- <10000 (less than ten thousand)
- 10000-20000 (between ten thousand and twenty thousand)
- >20000 (more than twenty thousand)

1. Do you have dental insurance?

- Yes
- No

1. If your answer in the previous question was (Yes), approximately how much is it?

- Less than 2000 (less than 2000)
- 2000-4000 (between two thousand and four thousand)
- 4000-6000 (between four thousand and six thousand)
- More than 6000

Second Section: dentists

1. Do you prefer your dentist to be:

- Saudi
- Non-Saudi
- Does not matter

1. For the following dental specialties, what is your preference regarding the sex of the dentist?

| Specialty: | Sex: |
| --- | --- |
| Oral maxillofacial surgeon | Female \ male\ doesn’t matter |
|  |  |
| Pedodontist | Female \ male\ doesn’t matter |
|  |  |
| General dentist | Female \ male\ doesn’t matter |

1. Which age do you prefer your dentist to be?

- Young dentist
- Older dentist
- Doesn’t matter

1. Which dentist’s rank do you prefer?

- General dentists
- Specialist
- Consultant
- Does not matter

1. Based on dentist’s reputation would you prefer:

- Well known dentist
  Not known dentist (not famous)
- Does not matter

1. Which style of communication do you prefer your dentist to have?

- Listener
- Explanatory

1. From the following different types of attires, which one would you prefer?


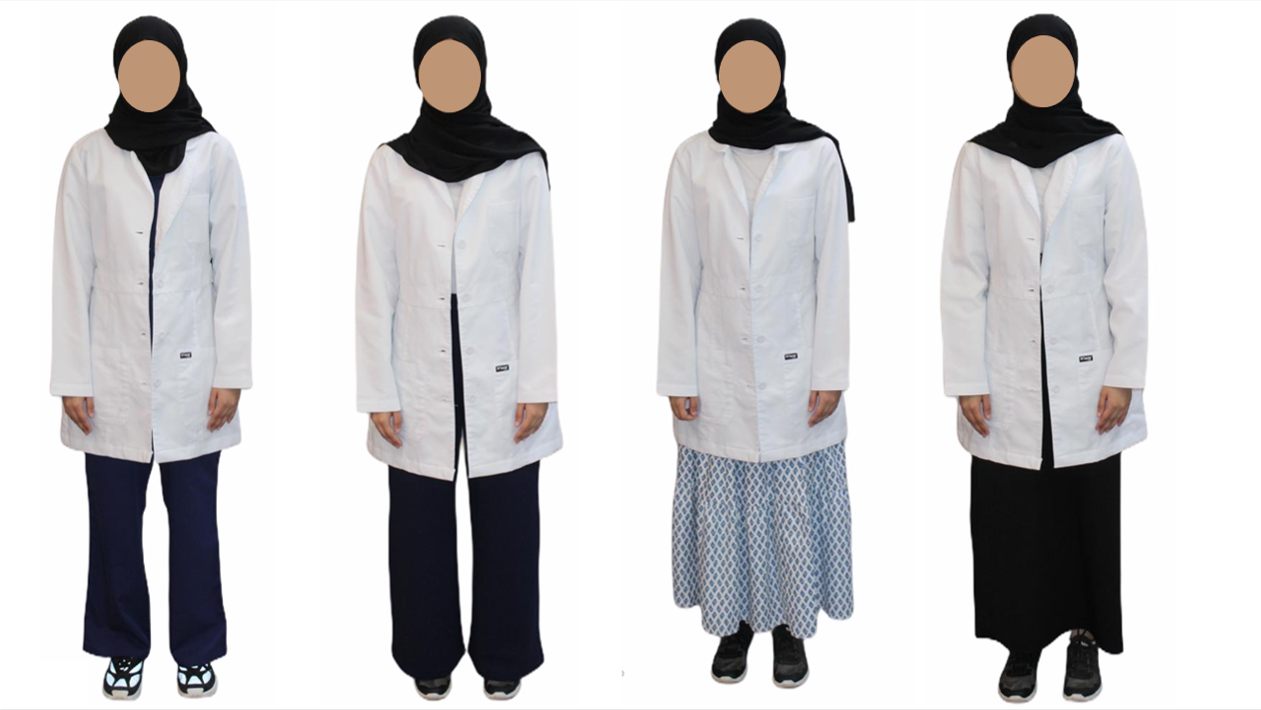


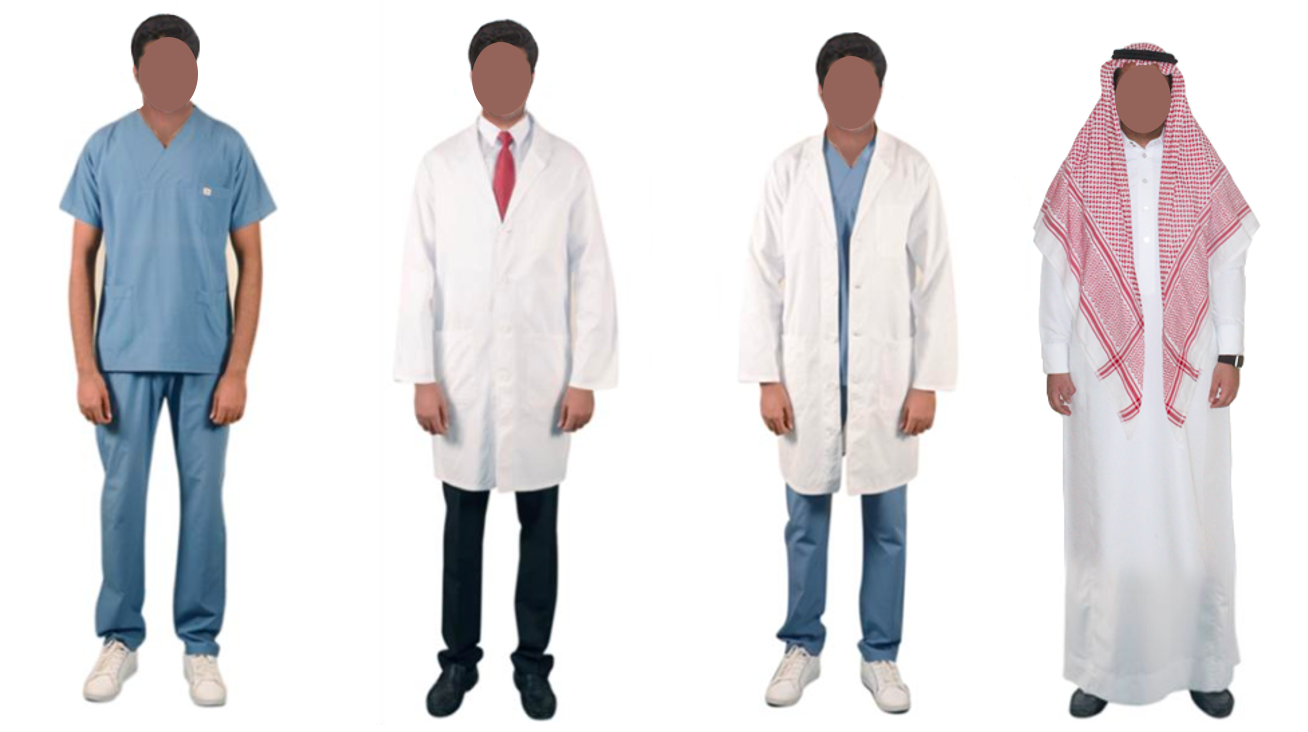


1. Do you prefer your dentist to have an account on social media?

- Yes
- No
- Does not matter

1. If your answer in the previous question was (Yes), which social media platform you prefer the most?

- Twitter
- Instagram
- Snapchat
- Other …………..

Third Section:

From the following pictures, which dental clinic setting design you prefer the most:


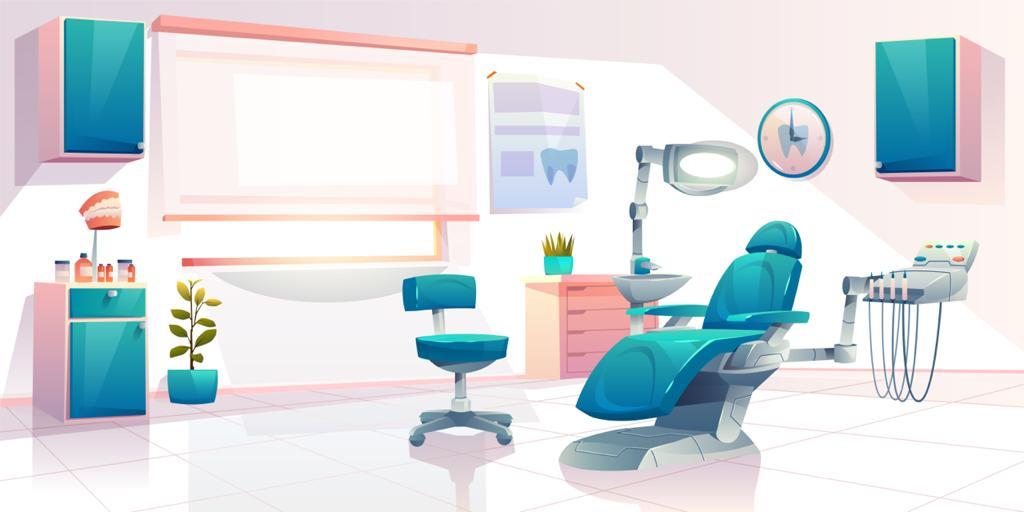


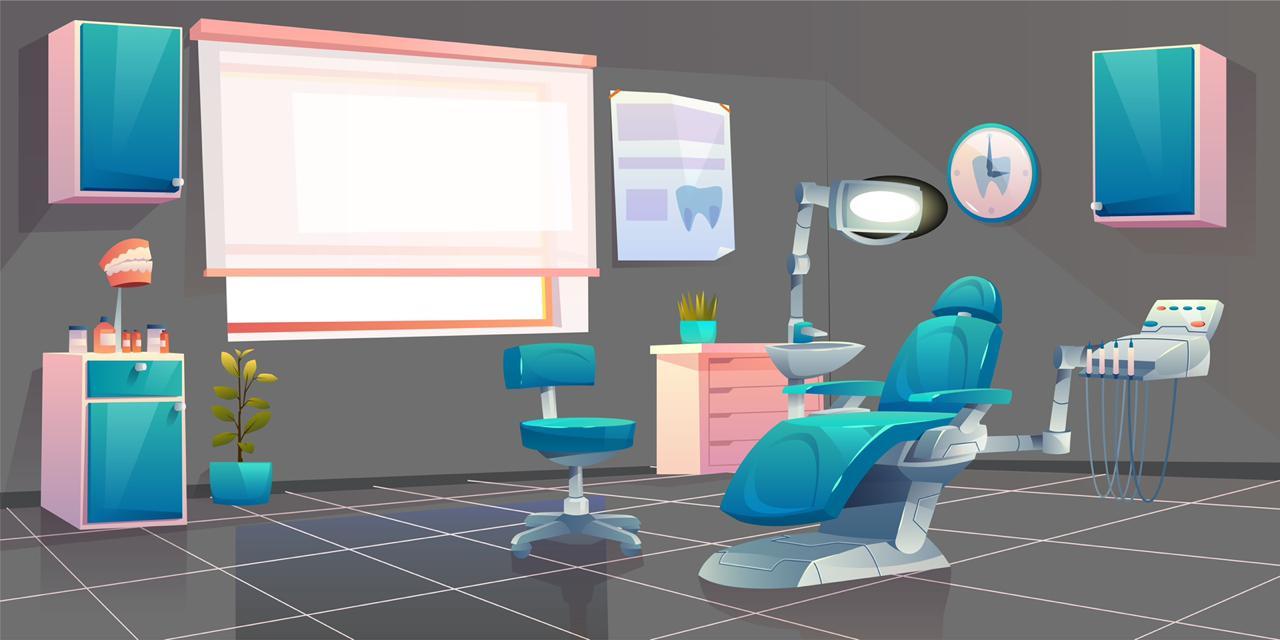

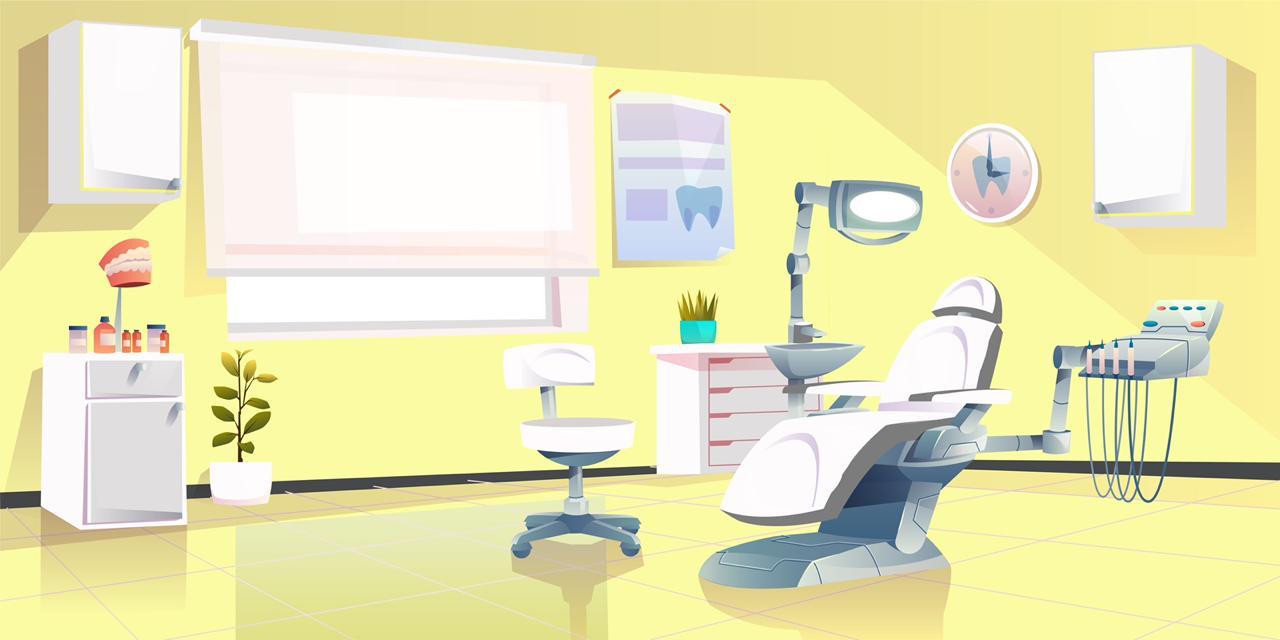

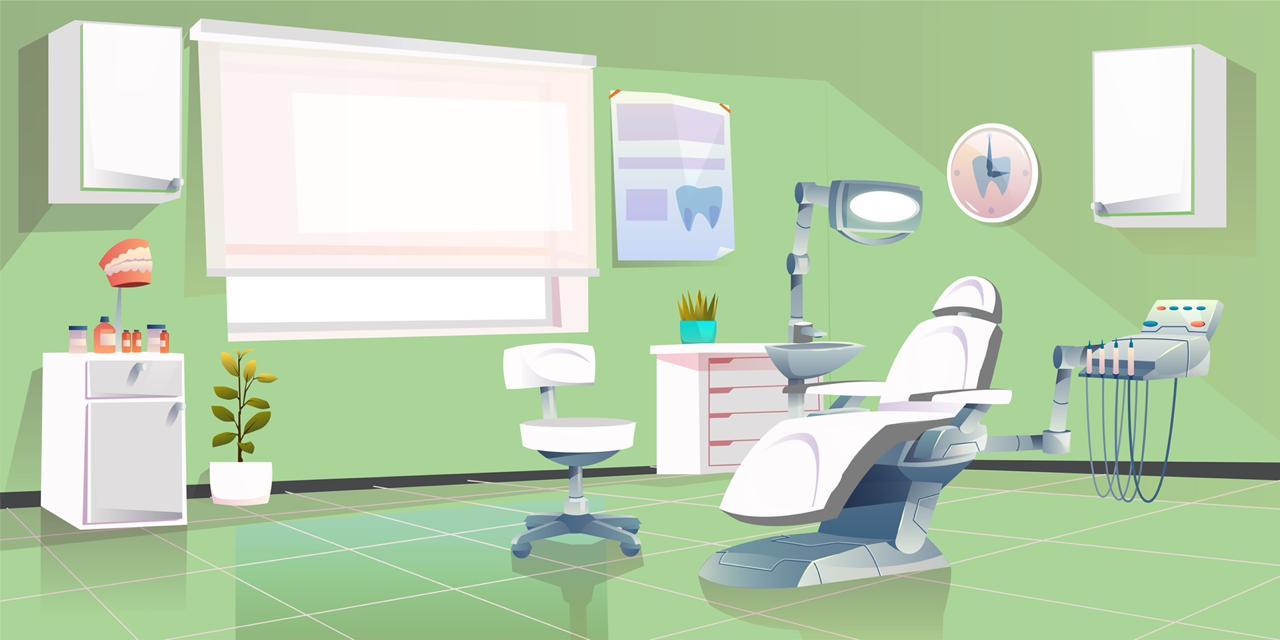


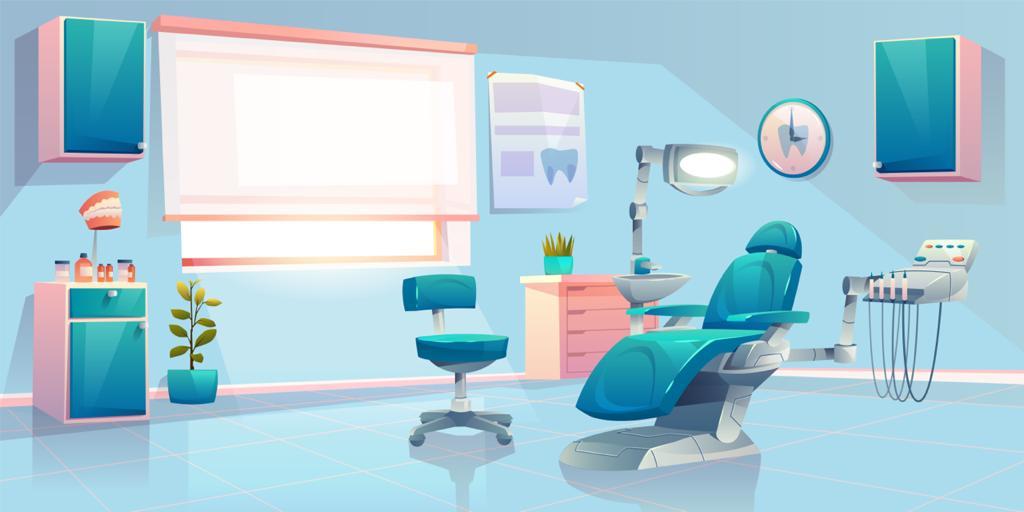


Last section:

How important are the following factors when you choose your dentist?

| Does not matter | Important | Very important |  |
| --- | --- | --- | --- |
|  |  |  | Dentist’s nationality |
|  |  |  | Dentist’s sex |
|  |  |  | Dentist’s age |
|  |  |  | Dentist’s rank |
|  |  |  | Dentist’s reputation |
|  |  |  | Dentist’s characteristic |
|  |  |  | Dentist’s attire |
|  |  |  | Dentist’s social media account |
|  |  |  | Cost of treatment |
|  |  |  | Location |
|  |  |  | Clinic Colore |
